# Supplementary material for: Photophysical and semiconducting properties of isomeric triphenylimidazole derivatives with a benzophenone moiety
Source: Royal Society of Chemistry journal article supplement (doi:10.1039/d1nj02149d), 2021-01-01
Supplement: d1nj02149d1.pdf [file d1nj02149d1.pdf]

**Supporting information for**  
**Photophysical and Semiconducting Properties of the Isomeric**  
**Triphenylimidazole Derivatives with Benzophenone Moiety**

Gintarė Grybauskaitė-Kaminskienė<sup>1</sup>, Vygailė Dudkaitė<sup>2</sup>, Gintautas Bagdžiūnas<sup>2,3\*</sup>

<sup>1</sup> Santaka Valley, Kaunas University of Technology, Barsausko str. 59, LT- 51423, Kaunas, Lithuania

<sup>2</sup> Group of Supramolecular Analysis, Institute of Biochemistry, Life Sciences Centre, Vilnius University, Sauletekio av. 7, LT- 10257, Vilnius, Lithuania

<sup>3</sup> Department of Functional Materials and Electronics, Center for Physical Sciences and Technology, Sauletekio av. 3, LT-10257, Vilnius, Lithuania

\*Correspondence: [gintautas.bagdziunas@gmc.vu.lt](mailto:gintautas.bagdziunas@gmc.vu.lt) (ORCID ID: 0000-0002-9924-6902)

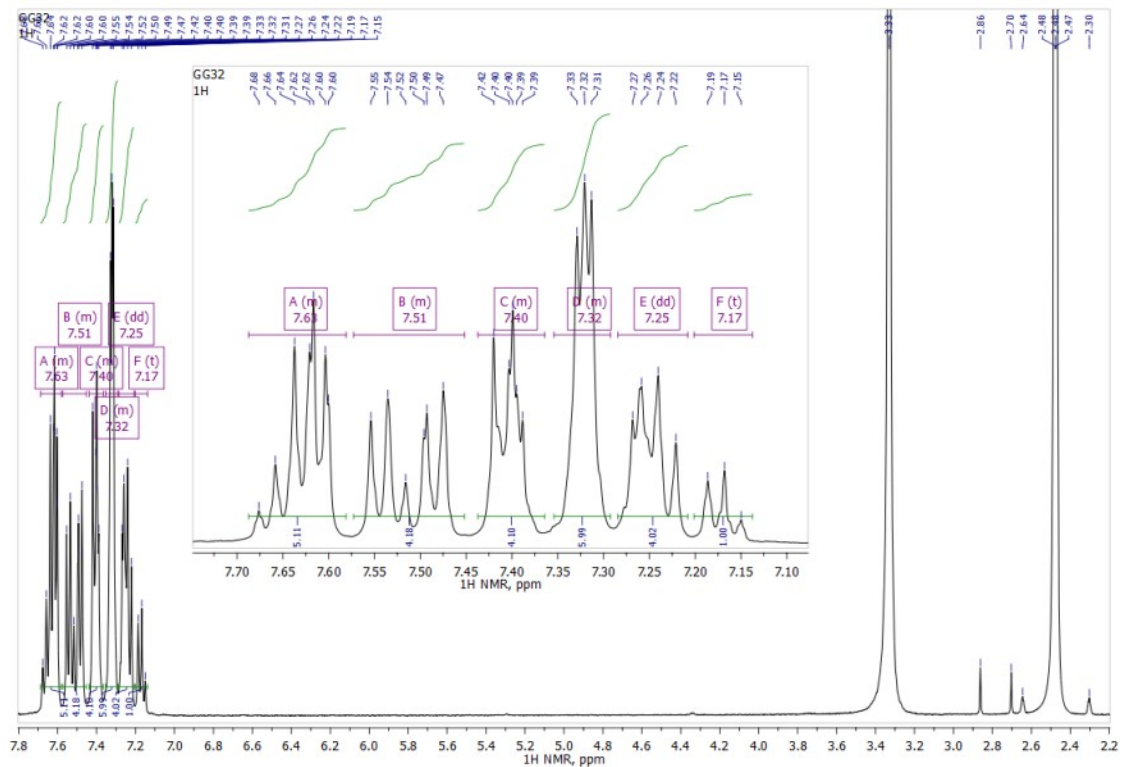

Figure S1.  $^1\text{H}$  NMR spectrum of the compound **1**.

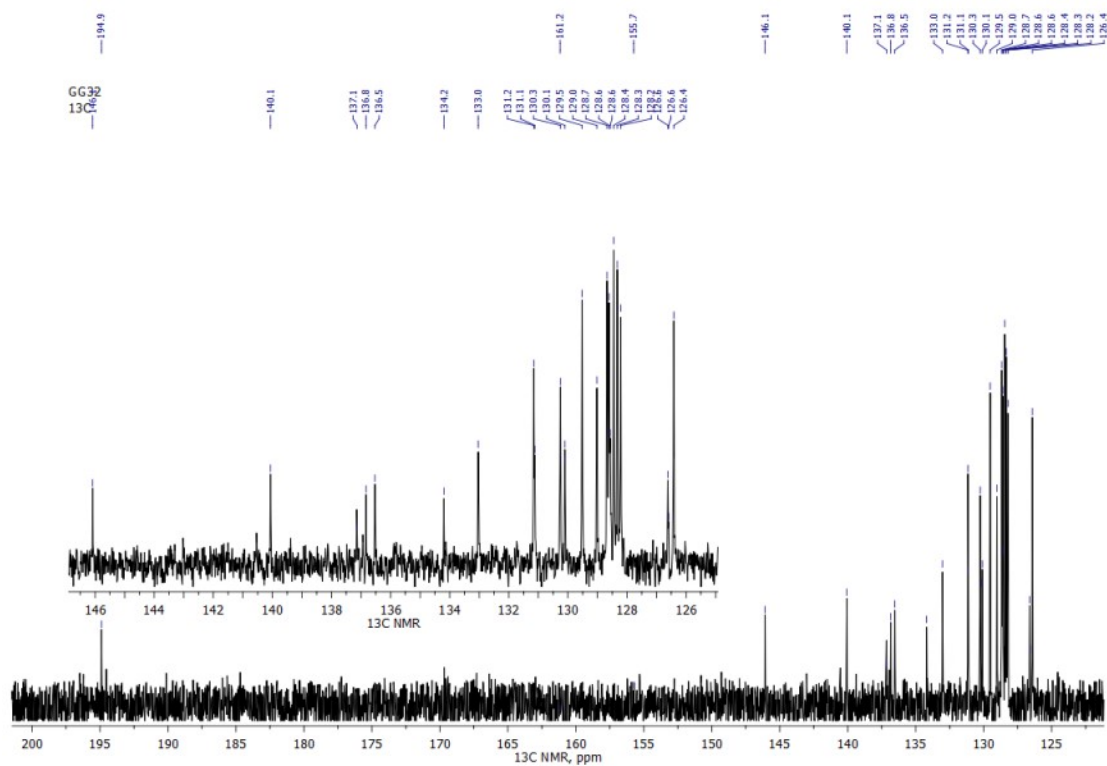

Figure S2.  $^{13}\text{C}$  NMR spectrum of the compound **1**.

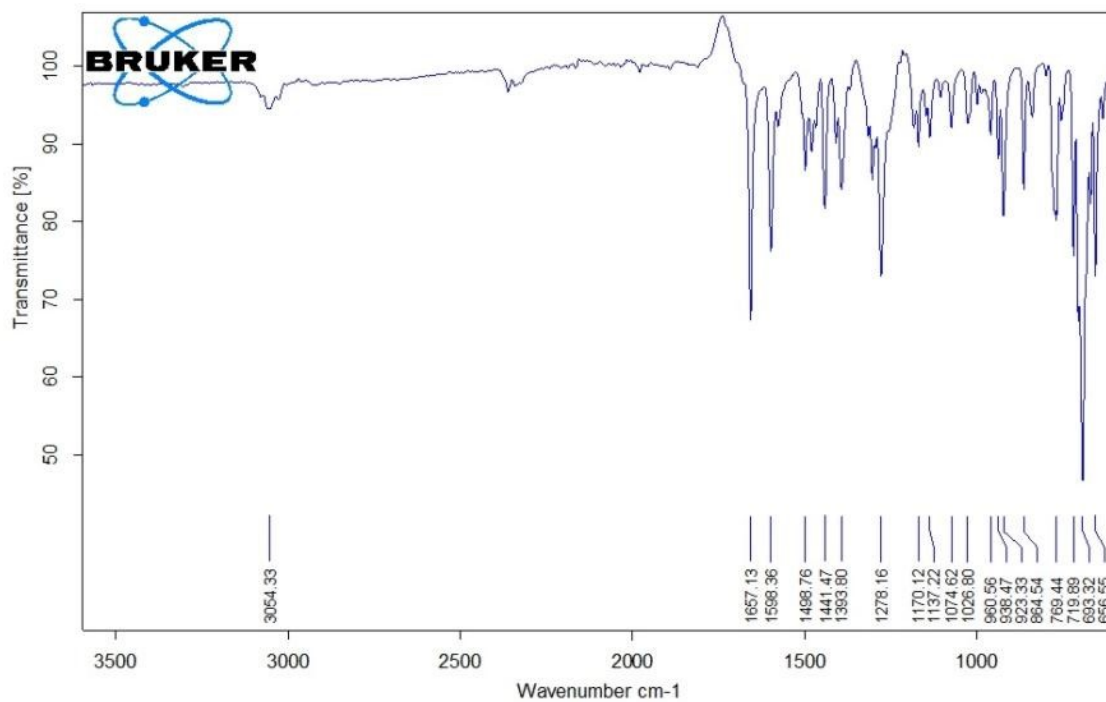

Figure S3. IR spectrum of of the compound 1.

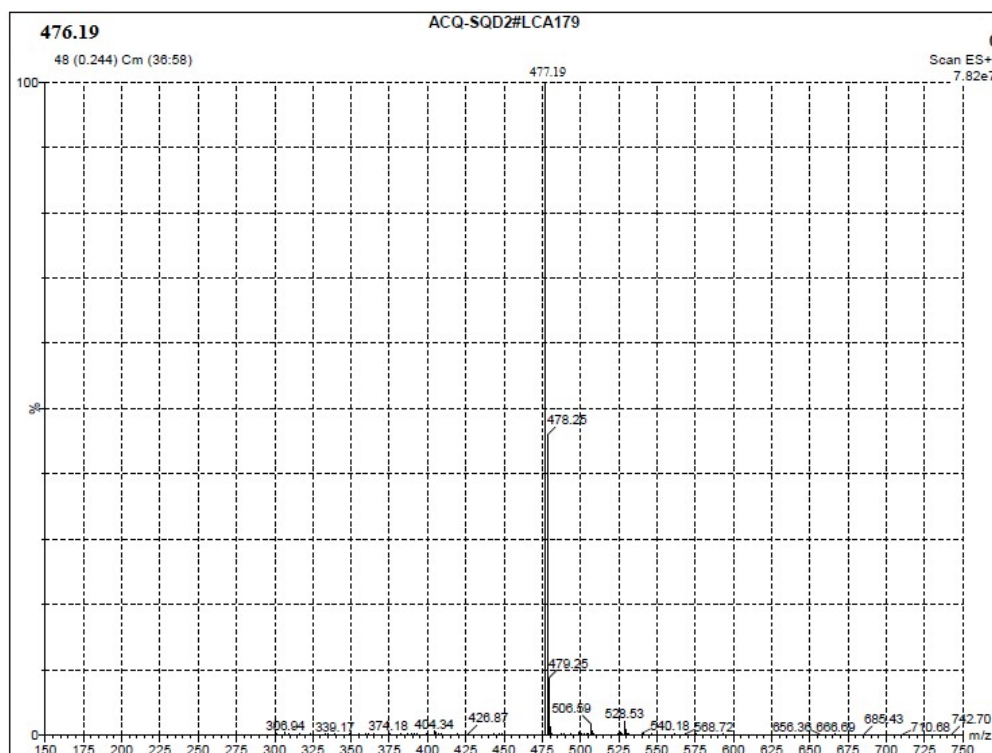

Figure S4. MS spectrum of compound 1.

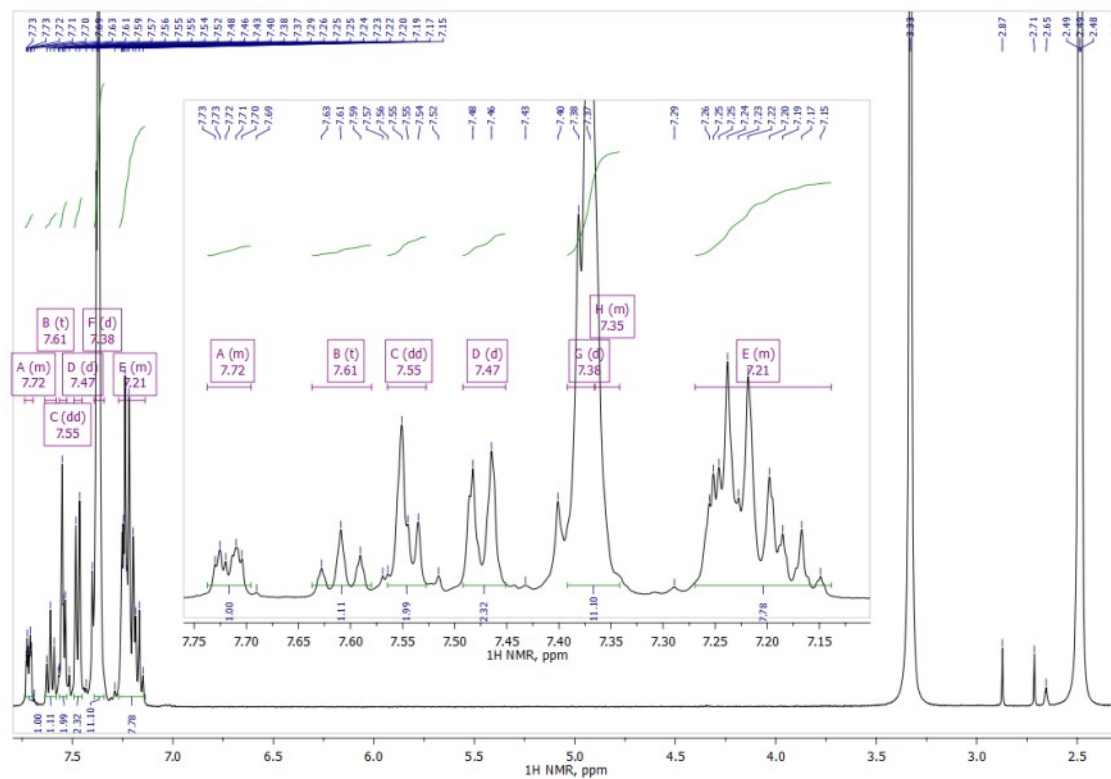

Figure S5.  $^1\text{H}$  NMR spectrum of the compound **2**.

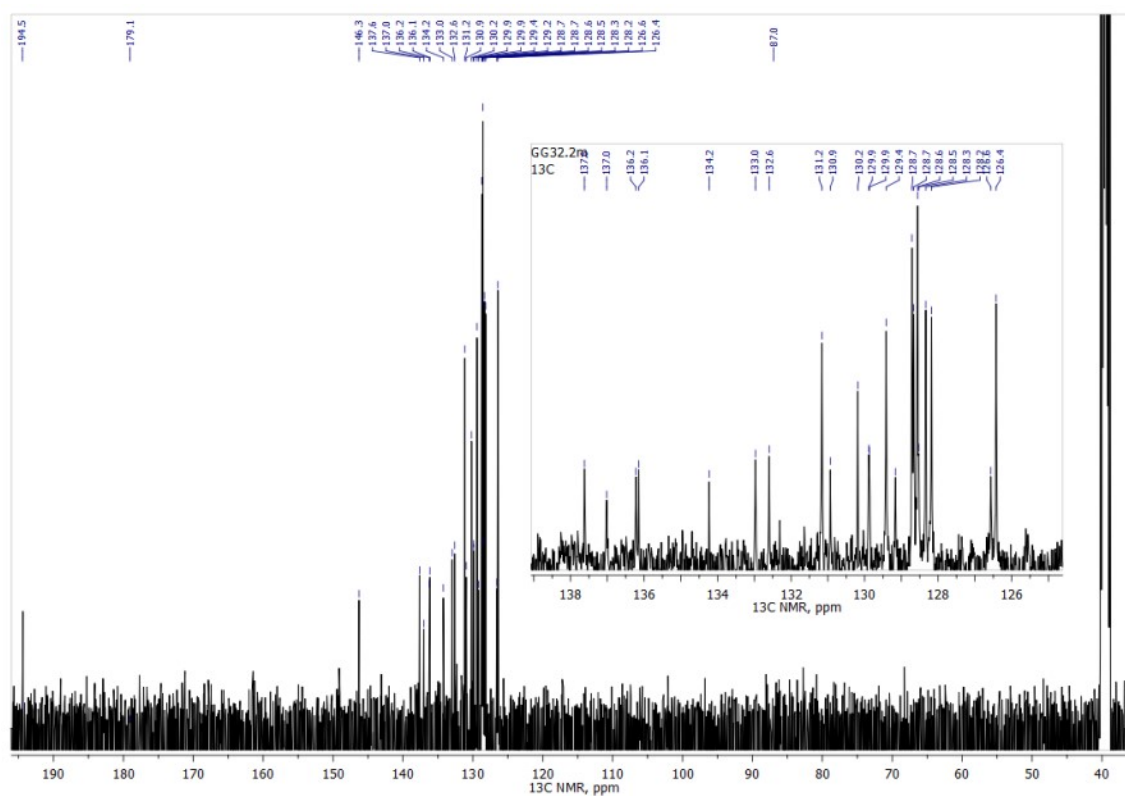

Figure S6.  $^{13}\text{C}$  NMR spectrum of the compound **2**.

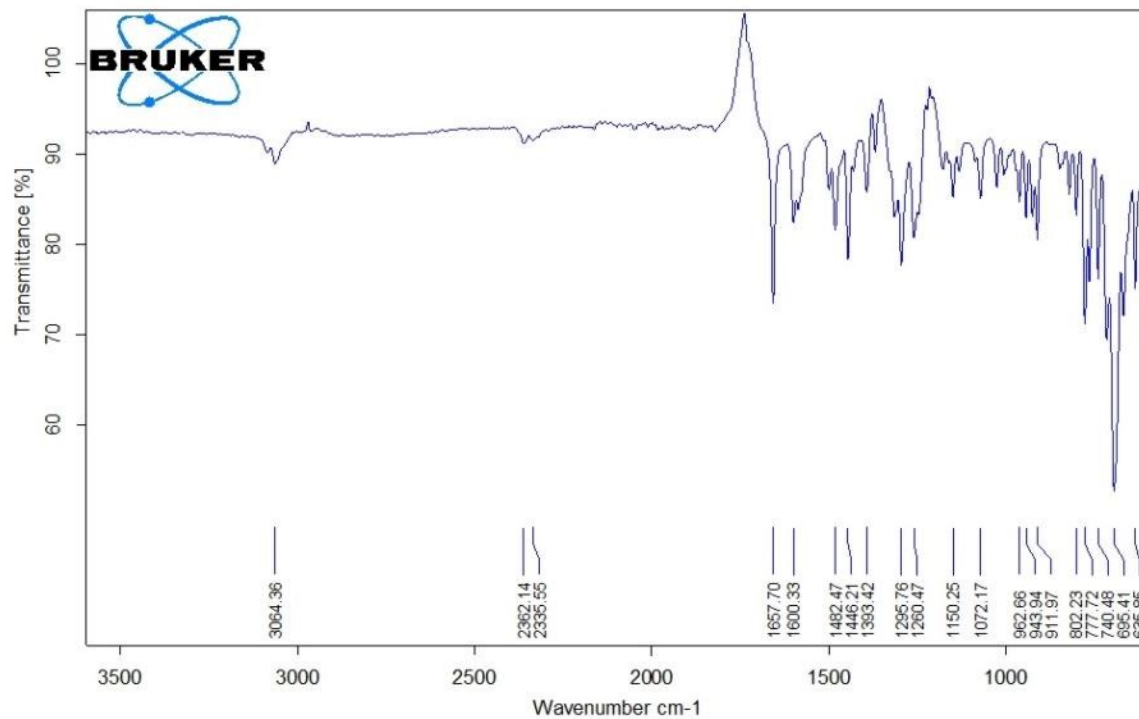

Figure S7. FT-IR spectrum of of the compound 2.

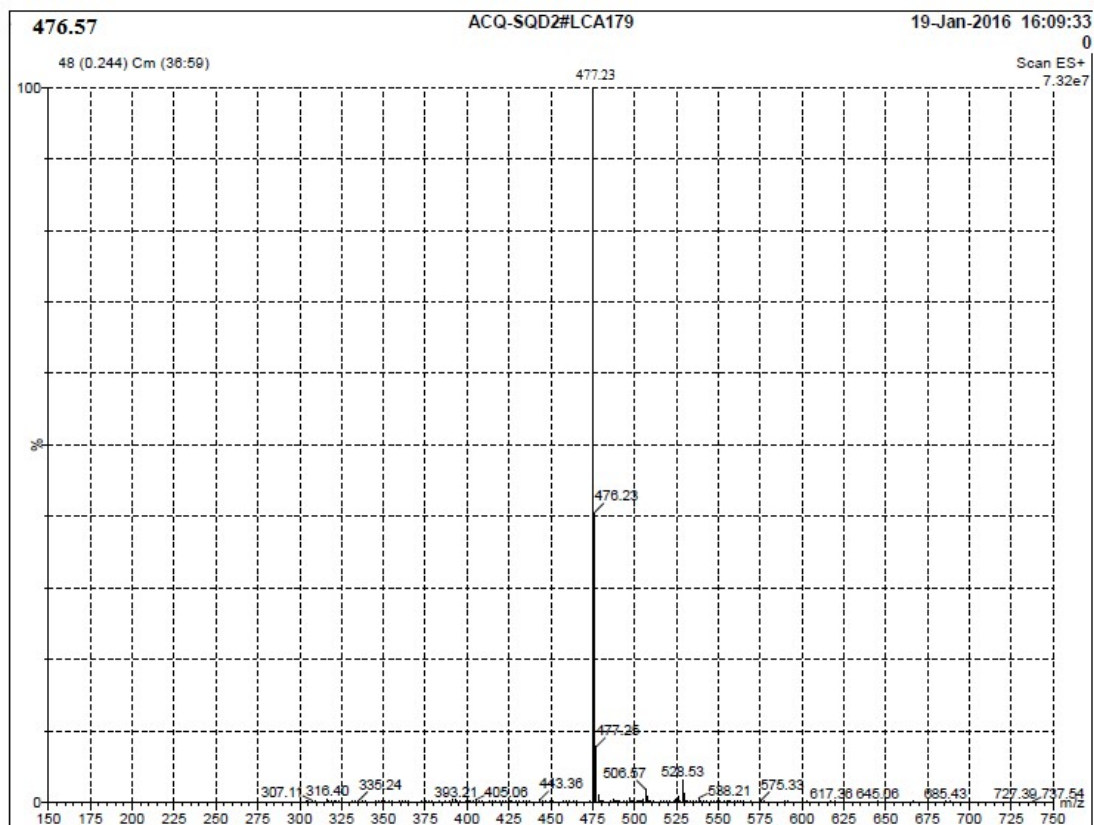

Figure S8. MS spectrum of compound 2.

Table S1. Crystallographic and refinement data of **1** and **2**.

| Compound                      | 1                                                                                  | 2                                                                                   |
|-------------------------------|------------------------------------------------------------------------------------|-------------------------------------------------------------------------------------|
| Crystal image on the needle   | 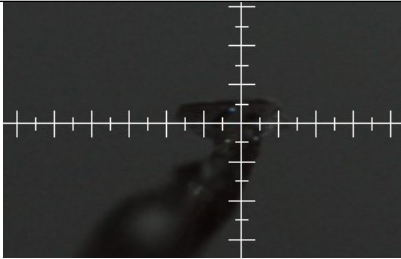 |  |
| CCDC deposition number        | 2061642                                                                            | 2061645                                                                             |
| Empirical formula             | C <sub>34</sub> H <sub>24</sub> N <sub>2</sub> O                                   | C <sub>34</sub> H <sub>24</sub> N <sub>2</sub> O                                    |
| Crystal dimensions (mm)       | 0.190 x 0.170 x 0.050                                                              | 0.480 x 0.300 x 0.110                                                               |
| Crystal System                | monoclinic                                                                         | triclinic                                                                           |
| Space group                   | P2 <sub>1</sub> /n (#14)                                                           | P-1 (#2)                                                                            |
| Z value                       | 4                                                                                  |                                                                                     |
| Unit cell lengths (Å)         | a = 9.37(2)<br>b = 21.01(4)<br>c = 13.22(3)                                        | a = 10.211(12)<br>b = 10.579(12)<br>c = 12.370(13)                                  |
| Unit cell angles (deg)        | β = 102.98(3)                                                                      | α = 99.13(2)<br>β = 99.02(2)<br>γ = 92.7263(10)                                     |
| Cell volume (Å <sup>3</sup> ) | 2536(10)                                                                           | 1299(3)                                                                             |
| Density (g/cm <sup>3</sup> )  | 1.248                                                                              | 1.218                                                                               |
| R-factor <sup>a</sup>         | 0.0877                                                                             | 0.0589                                                                              |
| wR2 <sup>b</sup>              | 0.2388                                                                             | 0.1772                                                                              |
| Temperature (K)               | 293                                                                                | 293                                                                                 |

a-  $R1 = \frac{\sum ||F_o| - |F_c||}{\sum |F_o|}$

b-  $wR2 = \left[ \frac{\sum (w(F_o^2 - F_c^2))^2}{\sum w(F_o^2)^2} \right]^{1/2}$



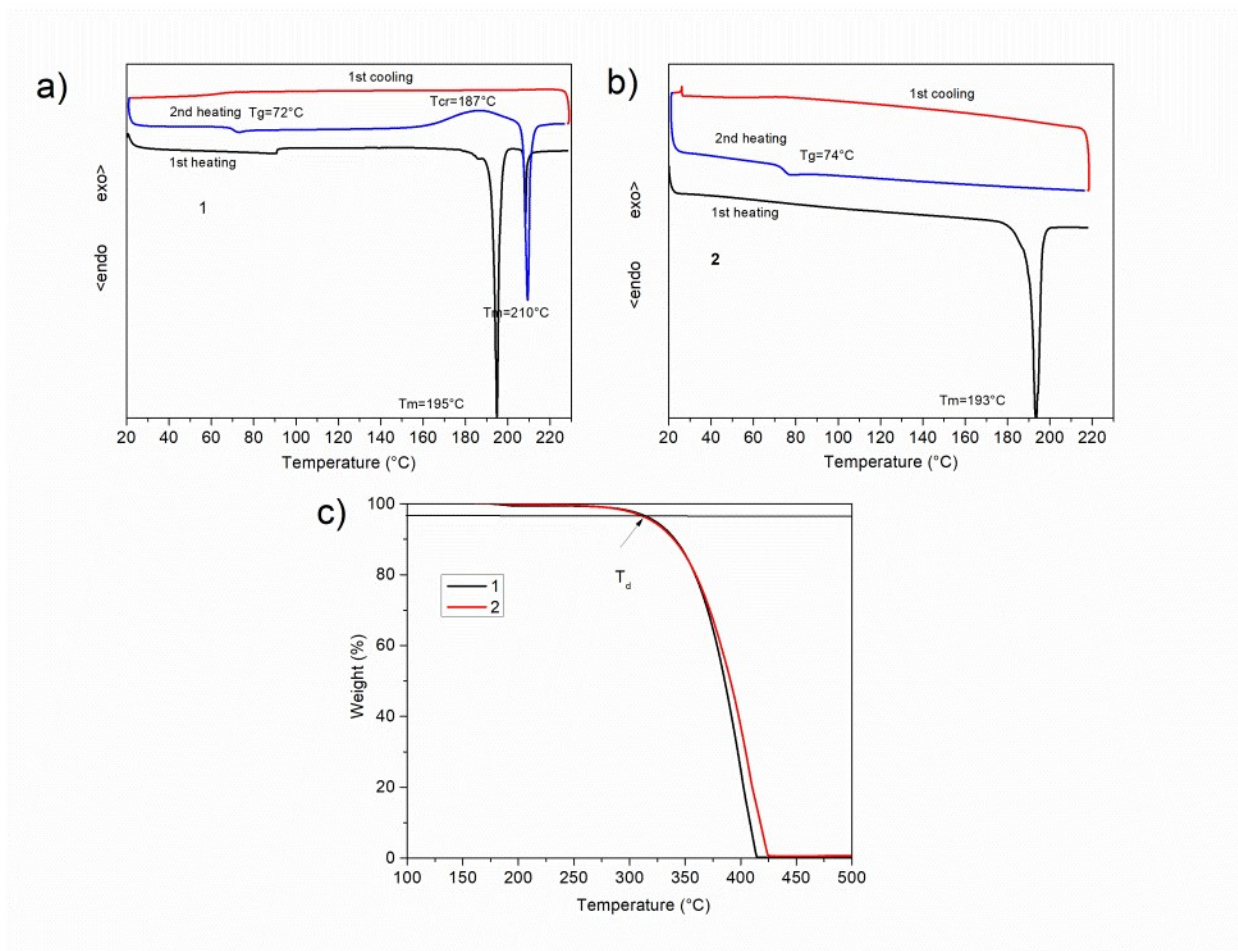

Figure S9. Thermal properties of 1 and 2: a) DCS of 1; b) DCS of 2; c) TGA of 1 and 2.

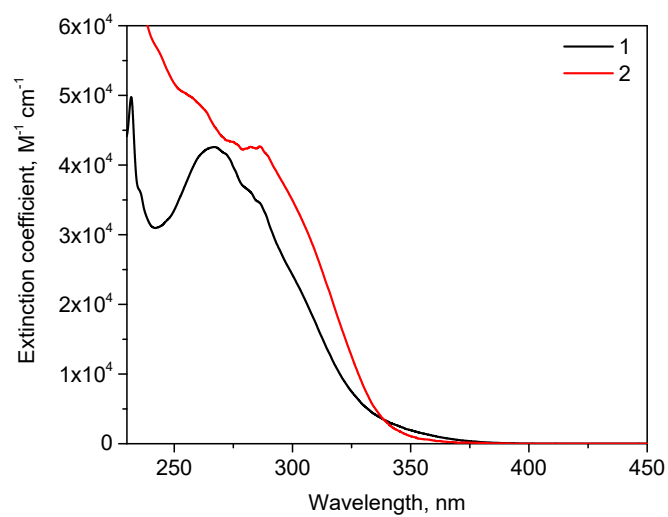

Figure S10. UV-vis spectra with extinction coefficients of 1 and 2 in THF. Concentration of the samples was  $2.1 \times 10^{-5} \text{ M}$ .

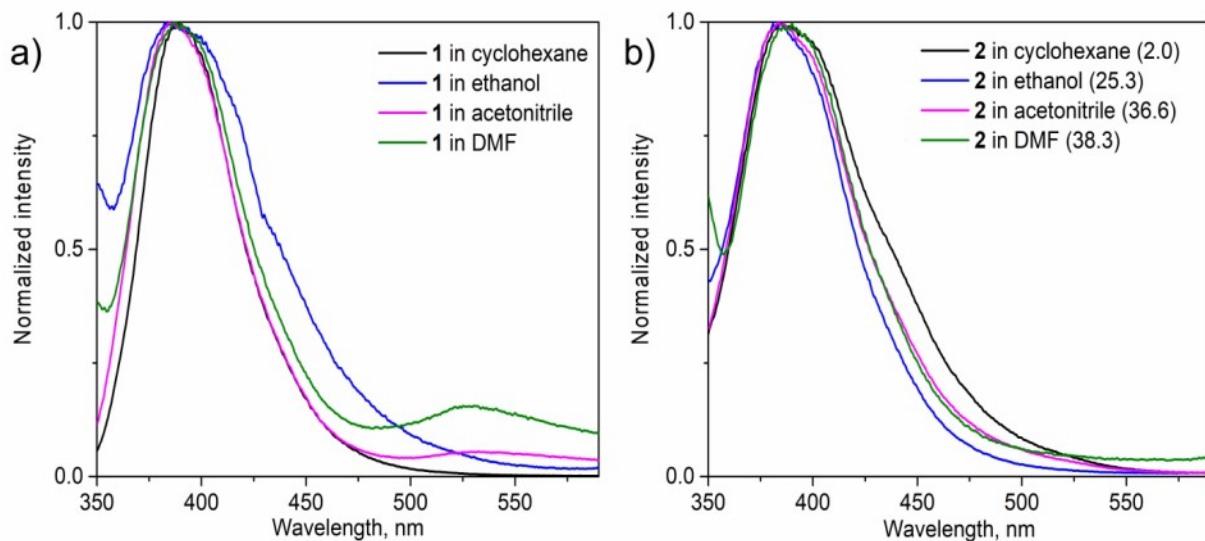

Figure S11. Solvatochromic effect on fluorescence spectra (a) for **1** and (b) for **2** in various organic solvents ( $c \sim 10^{-6}$  M, excitation was 310 nm).

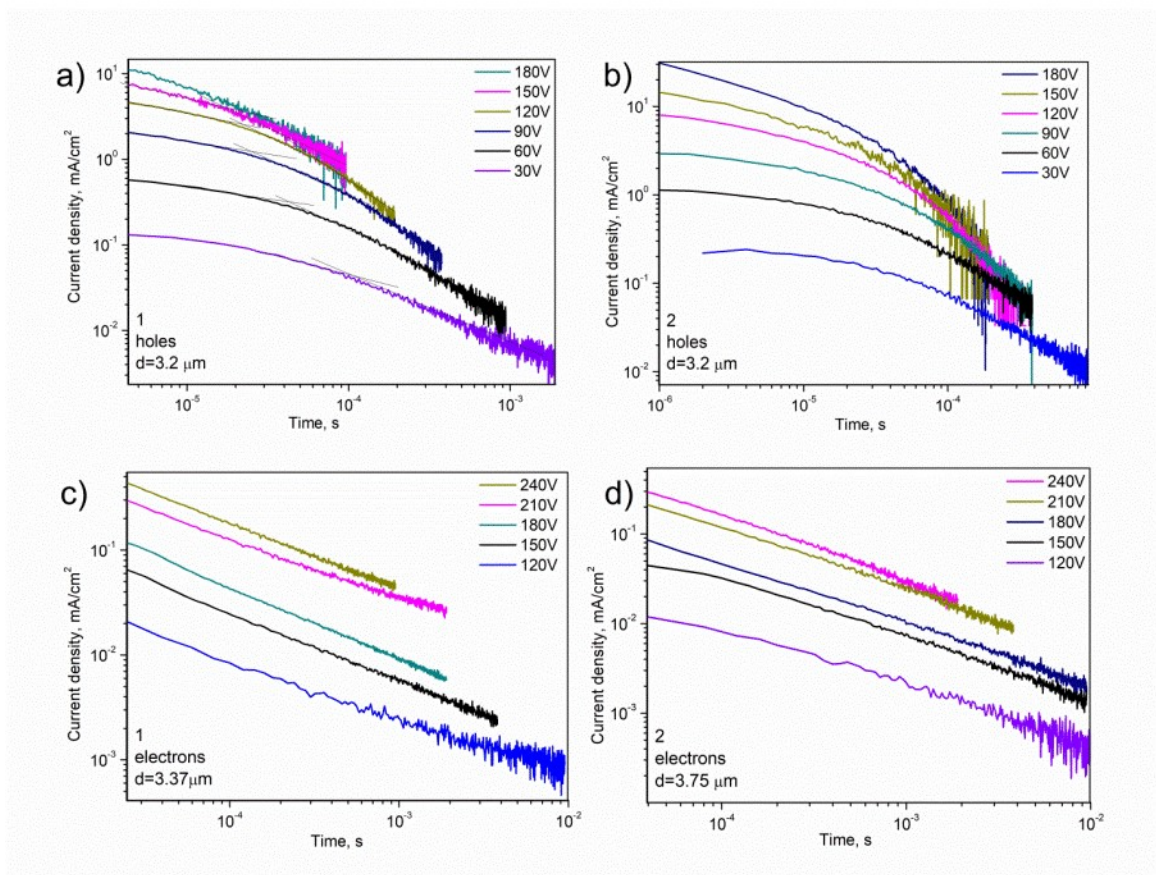

Figure S12. ToF pulses at the external electric fields of the transition of holes (a and b) and electrons (c and d) for the layers of **1** and **2**, respectively



Table S2. Calculated molecular volumes, isotropic polarizabilities and static dielectric constants of the corresponding materials

| Compound | V, Å <sup>3</sup> | R <sub>A, D</sub> , Å | A, Å <sup>3</sup> | ε <sub>st</sub> |
|----------|-------------------|-----------------------|-------------------|-----------------|
| 1        | 513.5             | 6.0                   | 82.24             | 2.89            |
| 2        | 513.5             | 6.0                   | 82.25             | 2.89            |

Table S3. Distances ( $d_{D-D}/d_{A-A}$ ) between the neighbouring donor and acceptor moieties, intermolecular interaction ( $-E_i$ ), total reorganization energies ( $\lambda_h/\lambda_e$ ), coupling integrals ( $|H_h|/|H_e|$ ), Gibbs free energies ( $\Delta G_h/\Delta G_e$ ) and hopping probabilities ( $P_h/P_e$ ) at F=0.

| Compound 1: $\lambda_h = 381$ meV; $\lambda_e = 394$ meV |                       |                               |                     |                               |                                           |
|----------------------------------------------------------|-----------------------|-------------------------------|---------------------|-------------------------------|-------------------------------------------|
| Pathway                                                  | $d_{D-D}/d_{A-A}$ , Å | $-E_i$ , kJ mol <sup>-1</sup> | $ H_h / H_e $ , meV | $\Delta G_h/\Delta G_e$ , meV | $P_h/P_e$                                 |
| 1D1                                                      | 6.18/13.2             | 122.1                         | 19.7/0.10           | 296/404                       | $5.9 \times 10^{-3}/5.9 \times 10^{-6}$   |
| 1D2                                                      | 4.40/15.6             | 110.6                         | 54.6/3.5            | 215/418                       | $0.35/2.3 \times 10^{-3}$                 |
| 1D3                                                      | 12.48/9.75            | 40.6                          | 0.1/7.5             | 398/370                       | $1.9 \times 10^{-23}/6.4 \times 10^{-16}$ |
| 1D4                                                      | 9.86/11.5             | 19.8                          | 57.7/22.9           | 372/390                       | $3.9 \times 10^{-21}/6.8 \times 10^{-19}$ |
| Compound 2: $\lambda_h = 372$ meV; $\lambda_e = 446$ meV |                       |                               |                     |                               |                                           |
| 2D1                                                      | 4.77/10.64            | 102.6                         | 56.5/4.0            | 258/402                       | $0.92/5.3 \times 10^{-5}$                 |
| 2D2                                                      | 4.68/14.7             | 94.6                          | 9.9/0.85            | 253/434                       | $1.3 \times 10^{-3}/2.9 \times 10^{-8}$   |
| 2D3                                                      | 10.1/11.5             | 37.3                          | 1.3/2.2             | 373/16                        | $2.6 \times 10^{-12}/3.4 \times 10^{-12}$ |
| 2D4                                                      | 12.3/14.3             | 6.5                           | 71.7/0.05           | 417/432                       | $5.9 \times 10^{-20}/4.0 \times 10^{-26}$ |
